# Supplementary material for: NRF2/Itaconate Axis Regulates Metabolism and Inflammatory Properties of T Cells in Children with JIA
Source: Antioxidants (Basel). 2022 Dec 8;11(12):2426. doi: 10.3390/antiox11122426 (PMC9774972; doi:10.3390/antiox11122426)
Supplement: Supplementary file 1 [file antioxidants-11-02426-s001.zip › antioxidants-2084129-supplementary.pdf]

## Supplementary files:

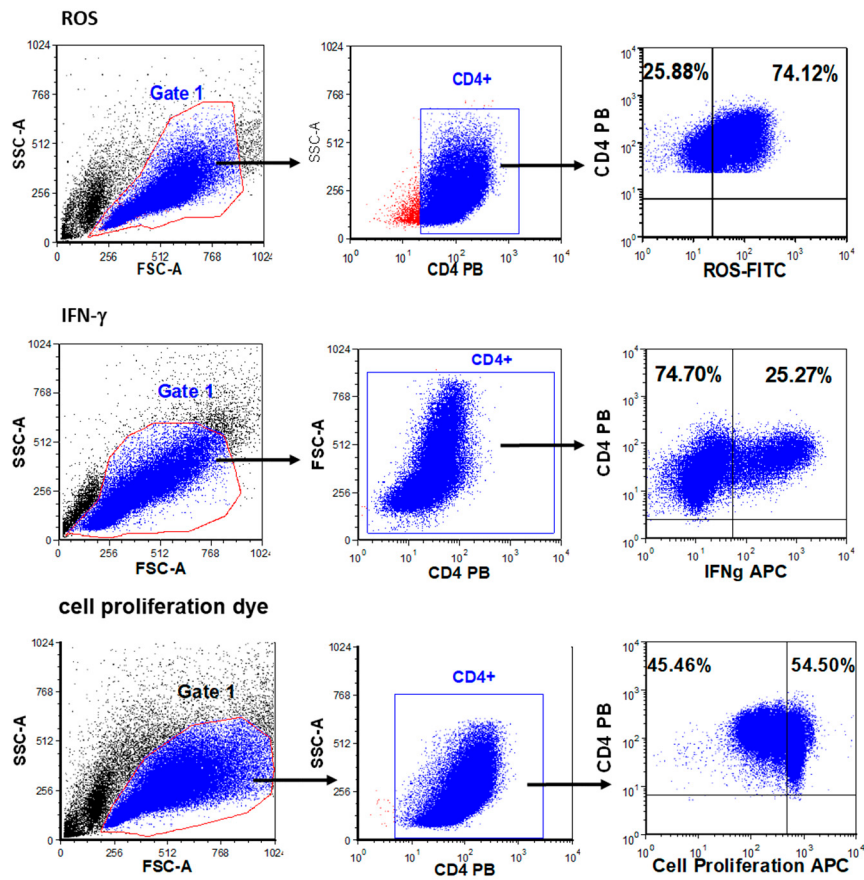

## Mitotracker & Mitosox assay

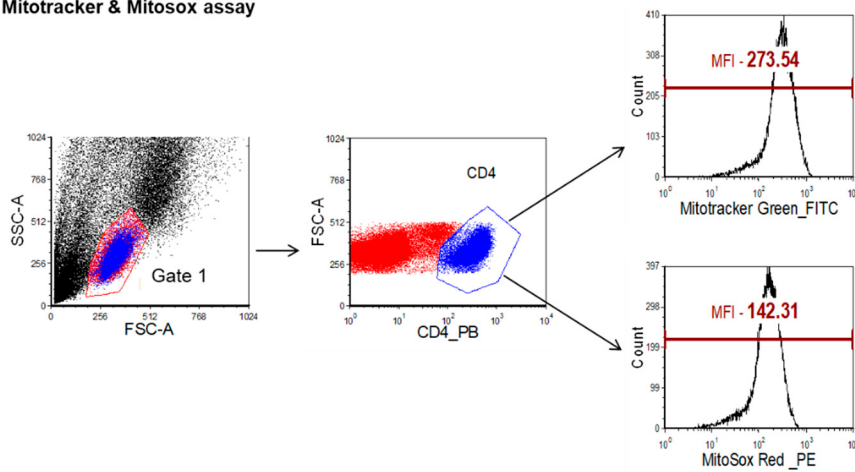

## Fatty acid uptake (BODIPY FL C12) assay

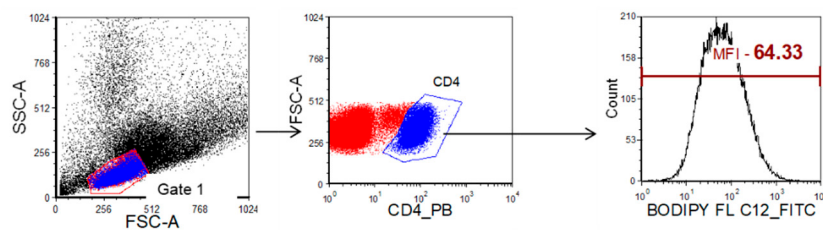

### Lipid droplet (BODIPY 493/503) assay

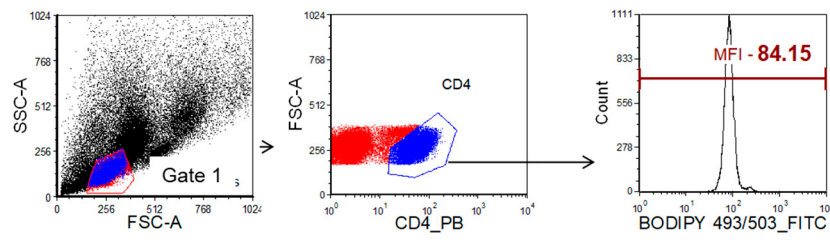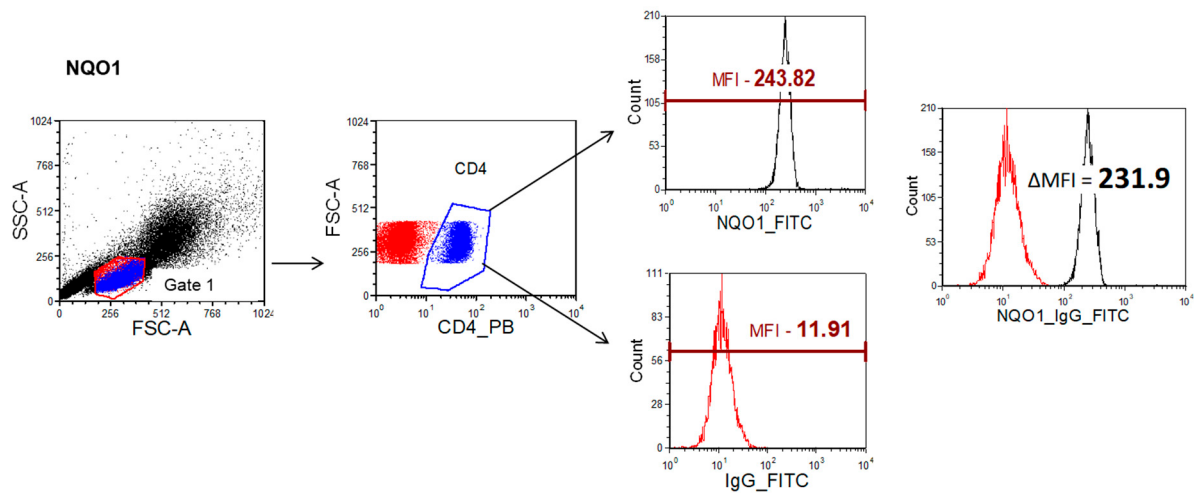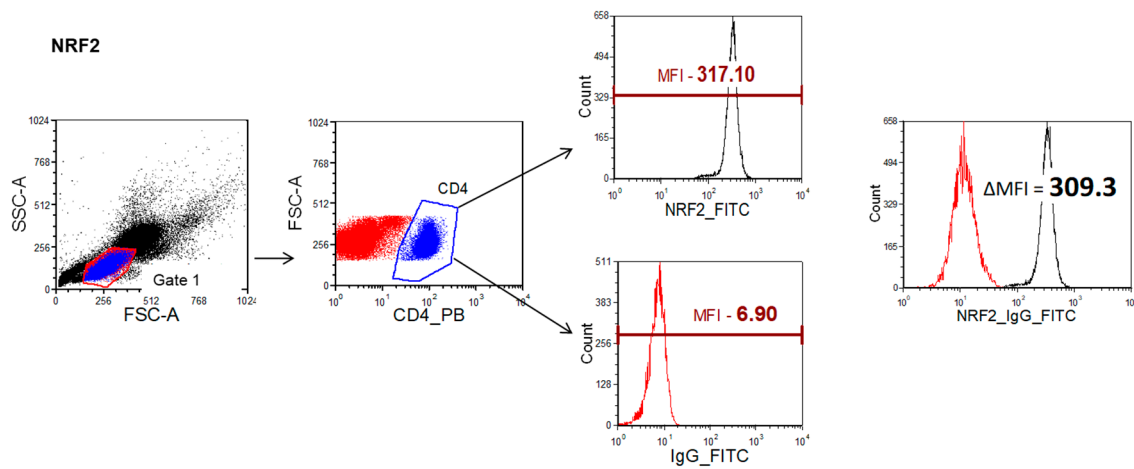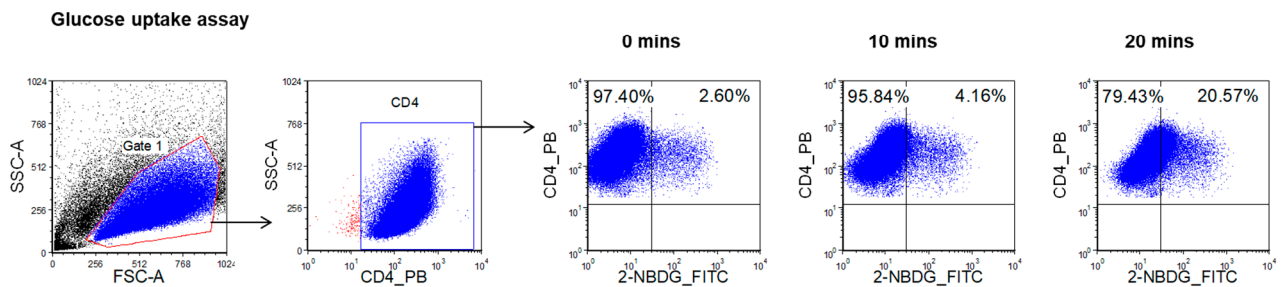

**Figure S1: Gating strategies.** Representative Dot Plots and histograms showing gating strategies and calculation of  $\Delta$  MFI.

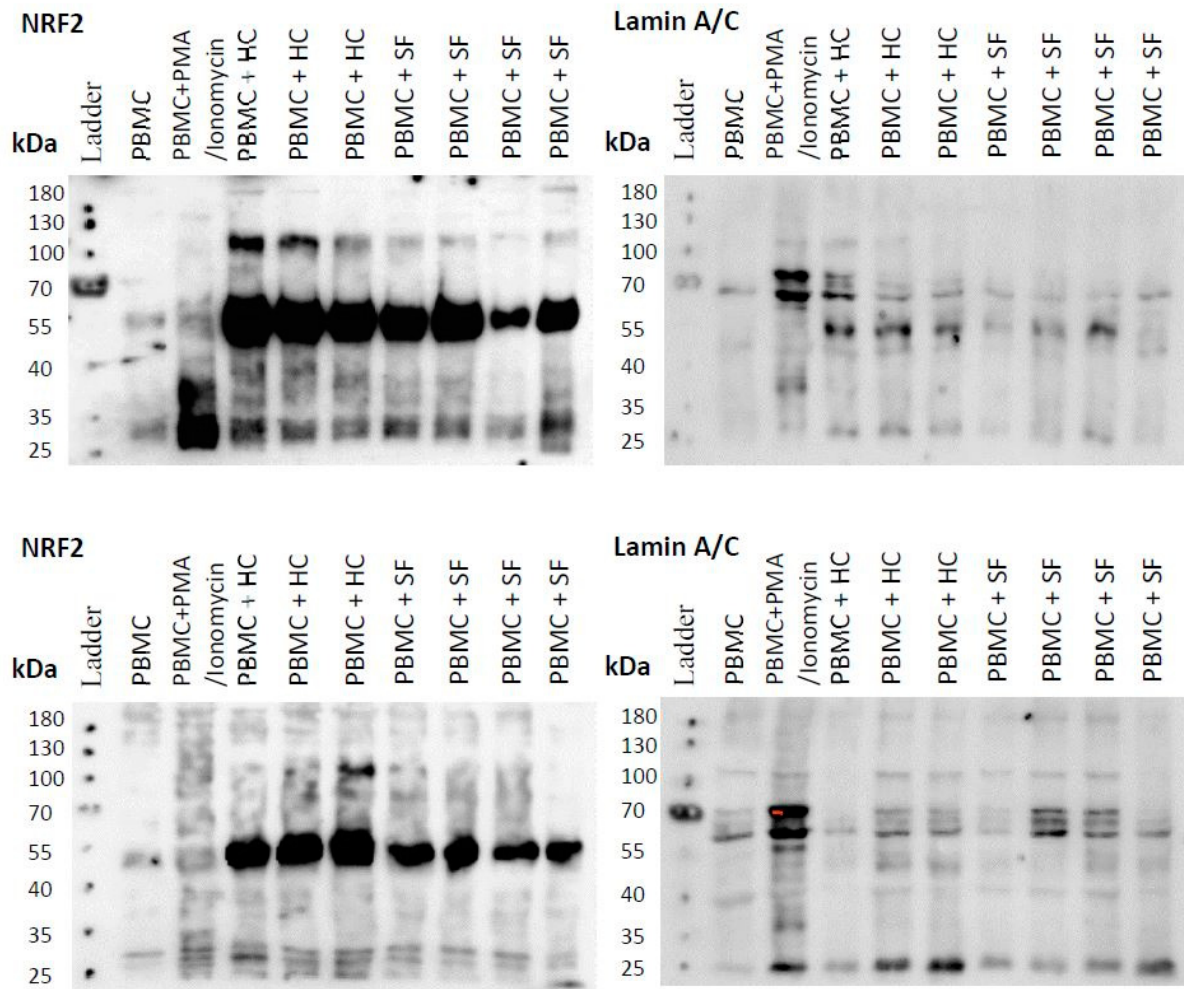

**Figure S2: NRF2 protein is reduced with SF incubation.** For analysis of NRF2 protein expression by Western blot, **A)** PBMCs were stimulated for 4 hours with 10 % HC (N = 6 for donors and 2 individual experiments) or 10 % SF (n = 8 for donors and 2 individual experiments). Afterwards the nuclear protein fractions were extracted, and Western blots performed with antibodies against NRF2 and Lamin A/C. Lamin A/C was used as a loading control. Quantification of NRF2 protein expression normalized to Lamin A/C protein expression.

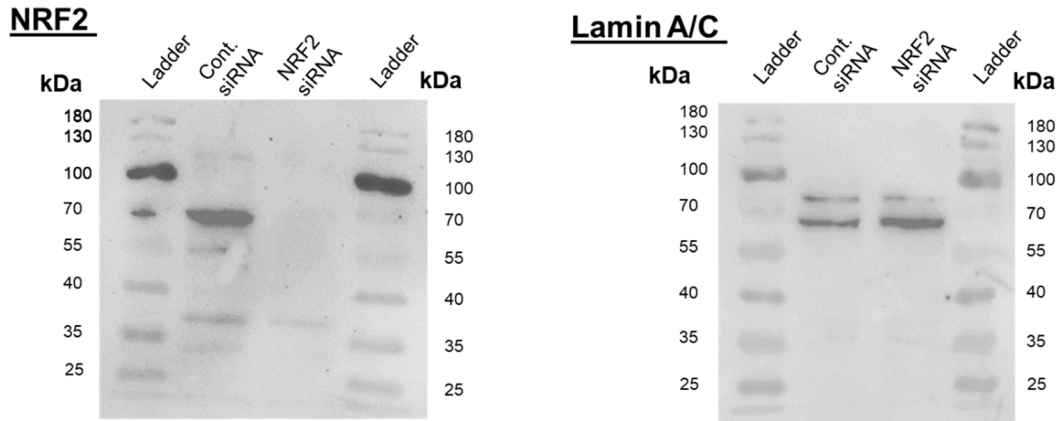

**Figure S3: NRF2 protein is downregulated after siRNA transfection.** For analysis of NRF2 protein expression by Western blot, PBMCs were transfected with control siRNA or *NFE2L2* siRNA. After 22 hours the nuclear protein fractions were extracted, and Western blots performed with antibodies against NRF2 and Lamin A/C. Lamin A/C was used as a loading control.

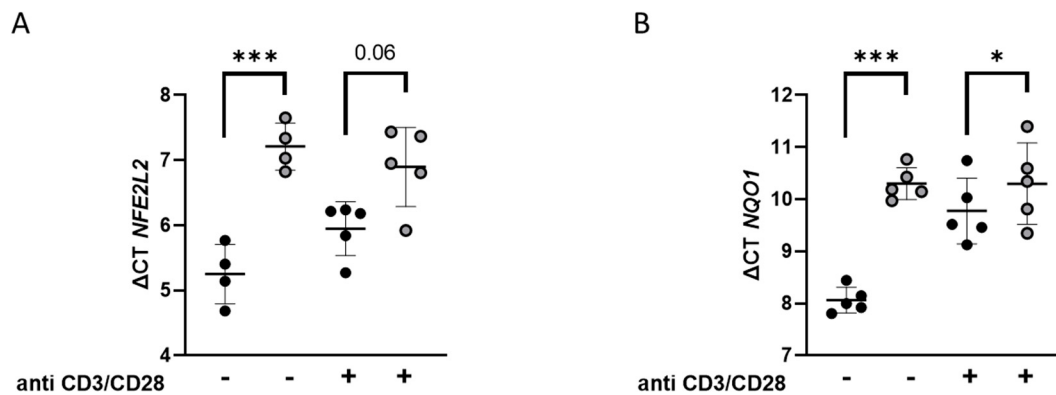

**Figure S4:  $\Delta$ Ct levels of *NFE2L2* and *NQO1* expression after siRNA transfections.** PBMCs were transfected with *NFE2L2* siRNA (10nM) and control siRNA using Neon transfection system. After incubation for 24 hours, cells were left either unstimulated or stimulated with anti-CD3/CD28 for 24 hours. A) *NFE2L2* mRNA expression in unstimulated (N=4) and stimulated cells (N=5). B) *NQO1* mRNA expression in unstimulated (N=5) and stimulated cells (N=5).
